# Supplementary material for: Surgeon Volume and Operative Mortality in the United States
Source: Atypon-hosted journal article supplement (doi:10.1056/nejmsa035205), 2003-11-26
Supplement: nejm_birkmeyer_2117sa1.pdf [file nejm_birkmeyer_2117sa1.pdf]

# Supplementary Appendix

This appendix has been provided by the authors to give readers additional information about their work.

Supplement to: Birkmeyer JD, Stukel TA, Siewers AE, et al. Surgeon Volume and Operative Mortality in the United States. *N Engl J Med* 2003;349:2117-27.

**Supplementary Appendix 1. Number of Medicare Patients Treated by Low-Volume Surgeons, Medium-Volume Surgeons, and High-Volume Surgeons in Different Hospital-Volume Strata.\***

| Variable                                        | Low-Volume Hospitals |                        |                      | Medium-Volume Hospitals |                        |                      | High-Volume Hospitals |                        |                      | Total   |
|-------------------------------------------------|----------------------|------------------------|----------------------|-------------------------|------------------------|----------------------|-----------------------|------------------------|----------------------|---------|
|                                                 | Low-Volume Surgeons  | Medium-Volume Surgeons | High-Volume Surgeons | Low-Volume Surgeons     | Medium-Volume Surgeons | High-Volume Surgeons | Low-Volume Surgeons   | Medium-Volume Surgeons | High-Volume Surgeons |         |
| <b>Cardiovascular procedures</b>                |                      |                        |                      |                         |                        |                      |                       |                        |                      |         |
| Carotid endarterectomy                          |                      |                        |                      |                         |                        |                      |                       |                        |                      |         |
| No. of patients                                 | 23,149               | 14,988                 | 7,020                | 13,316                  | 17,129                 | 15,255               | 9,469                 | 12,319                 | 23,404               | 136,049 |
| No. of surgeons                                 | 4,843                | 1,047                  | 436                  | 2,466                   | 769                    | 373                  | 1,680                 | 504                    | 358                  | 8,818   |
| Coronary-artery bypass grafting                 |                      |                        |                      |                         |                        |                      |                       |                        |                      |         |
| No. of patients                                 | 40,209               | 22,445                 | 11,196               | 21,133                  | 27,836                 | 24,426               | 12,012                | 23,188                 | 38,147               | 220,592 |
| No. of surgeons                                 | 1,927                | 501                    | 262                  | 679                     | 327                    | 224                  | 378                   | 247                    | 245                  | 2,772   |
| Aortic-valve replacement                        |                      |                        |                      |                         |                        |                      |                       |                        |                      |         |
| No. of patients                                 | 7,863                | 4,979                  | 1,418                | 3,989                   | 6,070                  | 4,097                | 1,987                 | 3,470                  | 8,668                | 42,541  |
| No. of surgeons                                 | 1,440                | 402                    | 108                  | 543                     | 298                    | 115                  | 239                   | 153                    | 159                  | 2,440   |
| Elective repair of an abdominal aortic aneurysm |                      |                        |                      |                         |                        |                      |                       |                        |                      |         |
| No. of patients                                 | 7,696                | 4,264                  | 1,154                | 3,600                   | 5,493                  | 4,239                | 2,056                 | 3,646                  | 7,646                | 39,794  |
| No. of surgeons                                 | 3,279                | 800                    | 218                  | 1,333                   | 642                    | 282                  | 795                   | 379                    | 310                  | 6,276   |
| <b>Cancer resections</b>                        |                      |                        |                      |                         |                        |                      |                       |                        |                      |         |
| Pancreatic resection                            |                      |                        |                      |                         |                        |                      |                       |                        |                      |         |
| No. of patients                                 | 673                  | 289                    | 6                    | 324                     | 514                    | 238                  | 65                    | 120                    | 831                  | 3,060   |
| No. of surgeons                                 | 671                  | 185                    | 4                    | 324                     | 256                    | 52                   | 65                    | 59                     | 71                   | 1,624   |
| Esophagectomy                                   |                      |                        |                      |                         |                        |                      |                       |                        |                      |         |
| No. of patients                                 | 267                  | 228                    | 18                   | 129                     | 317                    | 140                  | 50                    | 113                    | 378                  | 1,640   |
| No. of surgeons                                 | 267                  | 176                    | 12                   | 129                     | 215                    | 52                   | 50                    | 68                     | 77                   | 997     |
| Resection for lung cancer                       |                      |                        |                      |                         |                        |                      |                       |                        |                      |         |
| No. of patients                                 | 4,451                | 2,913                  | 906                  | 2,122                   | 3,295                  | 2,352                | 1,095                 | 2,152                  | 4,806                | 24,092  |
| No. of surgeons                                 | 2,247                | 633                    | 191                  | 876                     | 444                    | 181                  | 440                   | 274                    | 189                  | 4,178   |
| Cystectomy (bladder)                            |                      |                        |                      |                         |                        |                      |                       |                        |                      |         |
| No. of patients                                 | 1,596                | 556                    | 179                  | 795                     | 587                    | 528                  | 325                   | 263                    | 1,511                | 6,340   |
| No. of surgeons                                 | 1,366                | 273                    | 84                   | 627                     | 243                    | 131                  | 272                   | 104                    | 185                  | 2,918   |

\* Because some surgeons operate at multiple hospitals, the number of surgeons does not add up to the total for the rows.
